# Supplementary material for: Copy Number Variation Burden on Asthma Subgenome in Normal Cohorts Identifies Susceptibility Markers
Source: PubMed Central journal article supplement — Allergy Asthma Immunol Res. 2014 Dec 18;7(3):265–75. doi: 10.4168/aair.2015.7.3.265 (PMC4397367; doi:10.4168/aair.2015.7.3.265), 2014-12-18
Supplement: aair-7-265-s001.pdf [file aair-7-265-s001.pdf]

**Supplementary Table 1.** Frequency of asthma genes under CNVs in males and females of study population

| Gene      | YRI |     | CEU |   | AJI |     | AJ II |     | CHB |     | China |     | Tibet |     | India |     | JPT |    | Australia |     | New world | Taiwan |      |     |
|-----------|-----|-----|-----|---|-----|-----|-------|-----|-----|-----|-------|-----|-------|-----|-------|-----|-----|----|-----------|-----|-----------|--------|------|-----|
|           | M   | F   | M   | F | M   | F   | M     | F   | M   | F   | M     | F   | M     | F   | M     | F   | M   | F  | M         | F   | M         | F      |      |     |
| ACAA1     |     |     |     |   |     |     |       |     |     |     |       |     |       |     |       |     |     |    |           |     |           |        | 1.0  |     |
| ACE       |     |     |     |   |     |     | 0.4   |     |     |     |       |     |       |     |       |     |     |    |           |     |           |        |      |     |
| ADAM8     | 1.8 |     |     |   | 3.8 | 5.3 | 8.5   | 7.4 |     |     |       |     | 18.2  | 15  |       |     |     |    | 5.2       |     |           |        | 6.5  | 8.6 |
| AICDA     |     |     |     |   | 0.4 |     | 0.4   |     |     |     |       |     |       |     |       |     |     |    |           |     |           |        |      |     |
| ALOX5     |     |     |     |   |     | 0.4 |       |     |     |     |       |     |       |     |       |     |     |    |           |     |           |        |      |     |
| BDNF      |     |     |     |   |     |     |       |     |     |     |       |     | 9.0   |     |       |     |     |    |           |     |           |        |      |     |
| C14orf180 |     |     |     |   |     |     |       |     |     |     |       |     |       |     |       |     |     |    | 3         |     |           |        |      |     |
| C5orf56   |     |     |     |   |     |     |       |     |     |     |       |     |       |     |       |     |     |    |           |     |           |        | 2.4  |     |
| CCL11     |     |     |     |   |     | 0.4 |       | 0.4 |     |     |       |     |       |     |       |     |     |    |           |     |           |        |      |     |
| CCL2      |     |     |     |   |     | 0.4 |       | 0.4 |     |     |       |     |       |     |       |     |     |    |           |     |           |        |      |     |
| CCR1      |     |     |     |   |     |     |       |     |     |     |       |     |       |     |       |     |     |    |           |     |           |        | 4.8  |     |
| CCL3L1    | 23  | 30  | 5   | 2 | 3   | 2   | 5     | 5   | 14  | 5   | 11    | 7   | 55    | 10  |       | 5   | 13  | 23 | 6         |     |           | 2      | 4    | 50  |
| CD69      |     |     |     |   |     |     |       |     |     |     |       |     |       |     |       |     |     |    |           |     |           |        | 2.4  |     |
| CDK2      |     |     |     |   |     |     |       | 0.4 |     |     |       |     |       |     |       |     |     |    |           |     |           |        |      |     |
| CHRM3     |     |     |     |   |     |     |       |     | 4.5 |     |       |     |       |     |       |     |     |    | 6         |     |           |        |      |     |
| CSF2      |     |     |     |   |     |     |       | 0.4 |     |     |       |     |       |     |       |     |     |    |           |     |           |        |      |     |
| CTNNA3    |     |     |     |   | 0.8 | 0.4 |       |     |     |     |       | 1.3 |       |     |       |     |     |    |           |     |           |        |      |     |
| CXCL12    |     |     |     |   |     | 0.8 |       |     |     |     |       |     |       |     |       |     |     |    | 3         | 5.2 |           |        |      |     |
| CYSLTR1   |     |     |     |   |     | 0.4 |       |     |     |     |       |     |       |     |       |     |     |    |           |     |           |        |      |     |
| DIAPH3    |     |     |     |   | 0.4 |     |       |     |     |     |       |     |       |     |       |     |     |    |           |     |           |        |      |     |
| DPP10     |     |     |     |   |     |     |       |     | 4.5 |     |       |     |       |     |       |     |     |    |           |     |           |        |      |     |
| EGFR      |     |     |     |   |     |     |       | 0.4 |     |     |       |     |       |     |       |     |     |    |           |     |           |        |      |     |
| GPX3      |     |     |     |   |     |     |       | 0.8 |     |     |       |     |       |     |       |     |     |    |           |     |           |        |      |     |
| GSTCD     |     |     |     |   | 0.4 |     |       |     |     |     |       |     |       |     |       |     |     |    |           |     |           |        |      |     |
| GSTT1     | 3.7 | 2.7 |     |   | 0.8 | 0.4 | 1.2   | 1.2 | 4.5 | 7.5 | 1.3   |     | 5     | 5.5 |       | 8.6 |     |    | 5.2       |     |           | 2.4    |      |     |
| HAVCR1    |     |     |     |   | 0.4 |     |       |     |     |     |       |     |       |     |       |     |     |    |           |     |           |        |      |     |
| HAVCR2    |     |     |     |   | 0.4 |     |       |     |     |     |       |     |       |     |       |     |     |    |           |     |           |        |      |     |
| HLA-DQA1  |     |     |     |   |     | 0.4 |       |     |     |     |       |     |       |     |       |     |     |    |           |     |           |        |      |     |
| HLA-DRA   |     |     |     |   |     |     |       |     |     |     |       |     |       |     |       |     |     |    |           |     |           |        | 5.2  |     |
| HLA-DRB1  |     |     |     |   | 0.4 |     | 0.4   |     |     |     |       |     | 9.0   | 5   |       |     |     |    |           |     |           |        | 5.2  |     |
| HLA-DRB5  |     |     |     |   | 0.8 |     | 0.4   |     |     |     |       |     | 9.0   | 5   |       |     |     |    |           |     |           |        | 15.7 |     |
| ICAM1     |     |     |     |   |     |     |       |     |     |     |       | 1.3 |       |     |       |     |     |    |           |     |           |        |      |     |
| IL13RA2   |     |     |     |   | 2.5 | 2.2 | 1.7   | 1.2 |     |     |       |     |       |     |       |     |     |    |           |     |           |        |      |     |
| IL17RB    |     |     |     |   |     | 0.4 |       | 0.4 |     |     |       |     |       |     |       |     |     |    |           |     |           |        |      |     |
| IL1A      |     |     |     |   |     |     |       |     |     |     |       |     |       |     |       |     |     |    |           |     |           |        | 12.1 |     |
| IL1B      |     |     |     |   |     |     |       |     |     |     |       |     |       |     |       |     |     |    |           |     |           |        | 12.1 |     |
| IL3       |     |     |     |   |     |     |       | 0.4 |     |     |       |     |       |     |       |     |     |    |           |     |           |        |      |     |
| IL33      |     |     |     |   |     |     |       | 0.4 |     |     |       |     |       |     |       |     |     |    |           |     |           |        |      |     |
| IL4R      |     |     |     |   |     |     |       |     |     |     |       |     |       |     |       |     |     |    |           |     |           |        | 2.4  |     |
| IL8       |     |     |     |   |     |     |       |     |     |     |       |     |       |     |       |     |     |    |           |     |           |        | 7.3  |     |
| IL9       |     |     |     |   |     |     |       |     |     |     |       |     |       |     |       |     |     |    | 3         |     |           |        |      |     |
| IRF1      |     |     |     |   |     |     |       |     |     |     |       |     |       |     |       |     |     |    |           |     |           |        | 2.4  |     |
| KCNIP4    |     |     |     |   | 0.8 | 0.4 |       | 0.4 |     |     |       |     |       |     |       |     |     |    |           |     |           |        |      |     |
| LTA       |     |     |     |   |     |     |       |     |     |     |       |     |       |     |       |     |     |    |           |     |           |        | 4.8  |     |
| MBL2      |     |     |     |   | 0.4 |     |       |     |     |     |       |     |       |     |       |     |     |    |           |     |           |        |      |     |

(Continued to the next page)
