# Supplementary material for: Copy Number Variation Burden on Asthma Subgenome in Normal Cohorts Identifies Susceptibility Markers
Source: PubMed Central journal article supplement — Allergy Asthma Immunol Res. 2014 Dec 18;7(3):265–75. doi: 10.4168/aair.2015.7.3.265 (PMC4397367; doi:10.4168/aair.2015.7.3.265), 2014-12-18
Supplement: aair-7-265-s002.pdf [file aair-7-265-s002.pdf]

**Supplementary Table 2.** CNVs identified with asthma associated genes with their chromosomal location, break-points, CN states and gene functions

| Gene      | Chromosome location | Break-point (bp)    | CN state | Gene function                                               |
|-----------|---------------------|---------------------|----------|-------------------------------------------------------------|
| ACAA1     | 3p22.2              | 38039344-38185174   | 3        | Acetyl-coA C-acyltransferase activity                       |
| ACE       | 17q23.3             | 61518220-61624537   | 3        | Actin binding                                               |
| ADAM8     | 10q26.3             | 135056464-135174110 | 0, 3     | Metalloendopeptidase activity                               |
| AICDA     | 12p13.31            | 8529380-8763073     | 1        | Cytidinedeaminase activity                                  |
| ALOX5     | 10q11.21            | 45827177-45940122   | 3        | Arachidonate 5-lipoxygenase activity                        |
| BDNF      | 11p14.1             | 27636885-27789198   | 3        | Growth factor activity                                      |
| C14orf180 | 14q32.33            | 104938308-105067722 | 3        | -                                                           |
| C5orf56   | 5q31.1              | 131721749-131825114 | 1        | -                                                           |
| CCL11     | 17q12               | 31953738-32936539   | 3        | Chemokine activity                                          |
| CCL2      | 17q12               | 31957151-32938022   | 3        | Chemokine activity                                          |
| CCR1      | 3p21.31             | 46129533-46281822   | 1        | Chemokine receptor activity                                 |
| CCL3L1    | 17q12               | 34437116-34629684   | 0,1,3,4  | Chemotactic for lymphocytes and monocytes                   |
| CD69      | 12p13.31            | 9879084-9993452     | 1        | Transmembrane signaling receptor activity                   |
| CDK2      | 12q13.2             | 56297625-56413629   | 3        | Cyclin-dependent protein serine/threonine kinase activity   |
| CHRM3     | 1q43                | 239917246-240298870 | 3        | G-protein coupled acetylcholine receptor activity           |
| CSF2      | 5q31.1              | 131317464-131419202 | 3        | Cytokine and growth factor activity                         |
| CTNNA3    | 10q21.3             | 68367662-68515140   | 1, 3     | Cadherin binding                                            |
| CXCL12    | 10q11.21            | 44860013-44975407   | 3        | Cytokine and growth factor activity                         |
| CYSLTR1   | Xq21.1              | 77513603-77753914   | 3        | Leukotriene receptor activity                               |
| DIAPH3    | 13q21.2             | 60204504-60381540   | 1        | Rho gtpase binding                                          |
| DPP10     | 2q14.1              | 116532508-116675350 | 3        | Serine-type peptidase activity                              |
| EGFR      | 7p11.2              | 55126900-55245507   | 3        | Epidermal growth factor-activated receptor activity         |
| GPX3      | 5q33.1              | 150399114-150513847 | 3        | Glutathione peroxidase activity                             |
| GSTCD     | 4q24                | 106447752-106760931 | 1        | -                                                           |
| GSTT1     | 22q11.23            | 24288422-24396802   | 0- 4     | Glutathione peroxidase activity                             |
| HAVCR1    | 5q33.3              | 156409111-156564456 | 3        | -                                                           |
| HAVCR2    | 5q33.3              | 156409111-156564456 | 3        | -                                                           |
| HLA-DQA1  | 6p21.32             | 32456671-32625083   | 1        | T cell receptor signaling pathway                           |
| HLA-DRA   | 6p21.32             | 32408527-32530286   | 4        | T cell receptor signaling pathway                           |
| HLA-DRB1  | 6p21.32             | 32456671-32625083   | 1, 4     | Peptide antigen binding                                     |
| HLA-DRB5  | 6p21.32             | 32429894-32530286   | 1, 4     | Peptide antigen binding                                     |
| ICAM1     | 19p13.2             | 10369086-10471048   | 1        | Transmembrane signaling receptor activity                   |
| IL13RA2   | Xq23                | 114205618-114397728 | 2, 3     | Cytokine receptor activity                                  |
| IL17RB    | 3p21.1              | 53775447-53890848   | 3        | Cytokine receptor activity                                  |
| IL1A      | 2q13                | 113500222-113644927 | 1        | Cytokine activity                                           |
| IL1B      | 2q13                | 113512866-113644927 | 1        | Cytokine activity                                           |
| IL3       | 5q31.1              | 131317464-131419202 | 3        | Cytokine activity                                           |
| IL33      | 9p24.1              | 6121448-6256144     | 1        | Cytokine activity                                           |
| IL4R      | 16p12.1             | 27251081-27377242   | 1        | Interleukin-4 receptor activity                             |
| IL8       | 4q13.3              | 74567500-74758477   | 1        | Chemokine activity                                          |
| IL9       | 5q31.1              | 135123627-135231195 | 3        | Cytokine activity                                           |
| IRF1      | 5q31.1              | 131721749-131825114 | 1        | Sequence-specific DNA binding transcription factor activity |
| KCNIP4    | 4p15.2              | 21637793-21740358   | 3        | Voltage-gated ion channel activity                          |
| LTA       | 6p21.33             | 31474688-31595882   | 1        | Cytokine activity                                           |
| MBL2      | 10q21.1             | 53511985-57787459   | 1        | Calcium-dependent protein binding                           |
| MUC2      | 11p15.5             | 1073860-1332223     | 3        | Protein binding                                             |
| MUC5B     | 11p15.5             | 1150425-1291777     | 3, 4     | Extracellular matrix structural constituent                 |

(Continued to the next page)

**Supplementary Table 2.** Continued

| Gene    | Chromosome location | Break-point (bp)    | CN state | Gene function                               |
|---------|---------------------|---------------------|----------|---------------------------------------------|
| NQO1    | 16q22.1             | 68860698-69771914   | 1        | NAD(P)H dehydrogenase (quinone) activity    |
| NRG1    | 8p12                | 32422268-32522771   | 3        | Cytokine and growth factor activity         |
| OPN3    | 1q43                | 241099314-242090693 | 3        | G-protein coupled receptor activity         |
| PIM1    | 6p21.2              | 37130282-37236436   | 3        | Protein serine/threonine kinase activity    |
| PRKG1   | 10q21.1             | 53511985-57787459   | 1        | Calcium channel regulator activity          |
| PTGER2  | 14q22.1             | 52788759-52902018   | 1        | Prostaglandin E receptor activity           |
| STAT3   | 17q21.2             | 40498189-40608285   | 1        | Transcription regulatory region DNA binding |
| TBXA2R  | 19p13.3             | 3554783-3700847     | 3        | Guanyl-nucleotide exchange factor activity  |
| TIMP3   | 22q12.3             | 33142908-33251959   | 3        | Metalloendopeptidase inhibitor activity     |
| TLR2    | 4q31.3              | 154515618-154825256 | 3        | Transmembrane signaling receptor activity   |
| TNF     | 6p21.33             | 31480272-31654732   | 1        | Cytokine activity                           |
| TNFAIP3 | 6q23.3              | 138092422-138206150 | 1        | Ubiquitin-specific protease activity        |
| TNS1    | 2q35                | 218600074-218709313 | 3        | Actin and protein binding                   |
| ZNF618  | 9q32                | 116811184-116930194 | 3        | DNA binding                                 |
